# Supplementary material
Source: publisher figshare collection journal article supplement (https://acs.figshare.com/ndownloader/files/5064259)
Supplement: Supplementary file 1 [file 5064259]

  
data_tab35 
  
_audit_creation_method            SHELXL-97 
_chemical_name_systematic 
; 
 ? 
; 
_chemical_name_common             ? 
_chemical_melting_point           ? 
_chemical_formula_moiety          ? 
_chemical_formula_sum 
 'C22 H28 Br N O4' 
_chemical_formula_weight          450.36 
  
loop_ 
 _atom_type_symbol 
 _atom_type_description 
 _atom_type_scat_dispersion_real 
 _atom_type_scat_dispersion_imag 
 _atom_type_scat_source 
 'C'  'C'   0.0033   0.0016 
 'International Tables Vol C Tables 4.2.6.8 and 6.1.1.4' 
 'H'  'H'   0.0000   0.0000 
 'International Tables Vol C Tables 4.2.6.8 and 6.1.1.4' 
 'N'  'N'   0.0061   0.0033 
 'International Tables Vol C Tables 4.2.6.8 and 6.1.1.4' 
 'O'  'O'   0.0106   0.0060 
 'International Tables Vol C Tables 4.2.6.8 and 6.1.1.4' 
 'Br'  'Br'  -0.2901   2.4595 
 'International Tables Vol C Tables 4.2.6.8 and 6.1.1.4' 
  
_symmetry_cell_setting            Triclinic 
_symmetry_space_group_name_H-M    P-1 
  
loop_ 
 _symmetry_equiv_pos_as_xyz 
 'x, y, z' 
 '-x, -y, -z' 
  
_cell_length_a                    7.3743(9) 
_cell_length_b                    10.8800(13) 
_cell_length_c                    13.1998(16) 
_cell_angle_alpha                 86.359(2) 
_cell_angle_beta                  78.295(2) 
_cell_angle_gamma                 78.992(2) 
_cell_volume                      1017.6(2) 
_cell_formula_units_Z             2 
_cell_measurement_temperature     150(2) 
_cell_measurement_reflns_used     4230 
_cell_measurement_theta_min       2.44 
_cell_measurement_theta_max       28.29 
  
_exptl_crystal_description        PLATES 
_exptl_crystal_colour             PALE-YELLOW 
_exptl_crystal_size_max           0.30 
_exptl_crystal_size_mid           0.20 
_exptl_crystal_size_min           0.08 
_exptl_crystal_density_meas       0 
_exptl_crystal_density_diffrn     1.470 
_exptl_crystal_density_method     'not measured' 
_exptl_crystal_F_000              468 
_exptl_absorpt_coefficient_mu     2.048 
_exptl_absorpt_correction_type    'empirical'
_exptl_absorpt_correction_T_min   0.5786 
_exptl_absorpt_correction_T_max   0.8533 
_exptl_absorpt_process_details    'sadabs' 
  
_exptl_special_details 
; 
 ? 
; 
  
_diffrn_ambient_temperature       150(2) 
_diffrn_radiation_wavelength      0.71073 
_diffrn_radiation_type            MoK\a 
_diffrn_radiation_source          'fine-focus sealed tube' 
_diffrn_radiation_monochromator   graphite 
_diffrn_measurement_device_type   'CCD area detector' 
_diffrn_measurement_method        'phi and omega scans' 
_diffrn_detector_area_resol_mean  ? 
_diffrn_standards_number          ? 
_diffrn_standards_interval_count  ? 
_diffrn_standards_interval_time   ? 
_diffrn_standards_decay_%         ? 
_diffrn_reflns_number             5287 
_diffrn_reflns_av_R_equivalents   0.0191 
_diffrn_reflns_av_sigmaI/netI     0.0407 
_diffrn_reflns_limit_h_min        -8 
_diffrn_reflns_limit_h_max        5 
_diffrn_reflns_limit_k_min        -12 
_diffrn_reflns_limit_k_max        12 
_diffrn_reflns_limit_l_min        -15 
_diffrn_reflns_limit_l_max        15 
_diffrn_reflns_theta_min          1.58 
_diffrn_reflns_theta_max          25.00 
_reflns_number_total              3536 
_reflns_number_gt                 3051 
_reflns_threshold_expression      >2sigma(I) 
  
_computing_data_collection        'Bruker SMART' 
_computing_cell_refinement        'Bruker SMART' 
_computing_data_reduction         'Bruker SAINT' 
_computing_structure_solution     'SHELXS-97 (Sheldrick, 1990)' 
_computing_structure_refinement   'SHELXL-97 (Sheldrick, 1997)' 
_computing_molecular_graphics     'Bruker SHELXTL' 
_computing_publication_material   'Bruker SHELXTL' 
  
_refine_special_details 
; 
 Refinement of F^2^ against ALL reflections.  The weighted R-factor wR and 
 goodness of fit S are based on F^2^, conventional R-factors R are based 
 on F, with F set to zero for negative F^2^. The threshold expression of 
 F^2^ > 2sigma(F^2^) is used only for calculating R-factors(gt) etc. and is 
 not relevant to the choice of reflections for refinement.  R-factors based 
 on F^2^ are statistically about twice as large as those based on F, and R- 
 factors based on ALL data will be even larger. 
; 
  
_refine_ls_structure_factor_coef  Fsqd 
_refine_ls_matrix_type            full 
_refine_ls_weighting_scheme       calc 
_refine_ls_weighting_details 
 'calc w=1/[\s^2^(Fo^2^)+(0.0663P)^2^+0.6727P] where P=(Fo^2^+2Fc^2^)/3' 
_atom_sites_solution_primary      direct 
_atom_sites_solution_secondary    difmap 
_atom_sites_solution_hydrogens    geom 
_refine_ls_hydrogen_treatment     mixed 
_refine_ls_extinction_method      none 
_refine_ls_extinction_coef        ? 
_refine_ls_number_reflns          3536 
_refine_ls_number_parameters      257 
_refine_ls_number_restraints      0 
_refine_ls_R_factor_all           0.0574 
_refine_ls_R_factor_gt            0.0492 
_refine_ls_wR_factor_ref          0.1271 
_refine_ls_wR_factor_gt           0.1235 
_refine_ls_goodness_of_fit_ref    1.115 
_refine_ls_restrained_S_all       1.115 
_refine_ls_shift/su_max           0.000 
_refine_ls_shift/su_mean          0.000 
  
loop_ 
 _atom_site_label 
 _atom_site_type_symbol 
 _atom_site_fract_x 
 _atom_site_fract_y 
 _atom_site_fract_z 
 _atom_site_U_iso_or_equiv 
 _atom_site_adp_type 
 _atom_site_occupancy 
 _atom_site_symmetry_multiplicity 
 _atom_site_calc_flag 
 _atom_site_refinement_flags 
 _atom_site_disorder_assembly 
 _atom_site_disorder_group 
N1 N 0.6489(4) 0.2916(3) 0.4601(2) 0.0257(7) Uani 1 1 d . . . 
Br1 Br 1.38264(6) 0.35495(4) 0.17340(3) 0.04313(18) Uani 1 1 d . . . 
O1 O 0.4712(4) -0.0891(3) 0.6263(2) 0.0383(7) Uani 1 1 d . . . 
O2 O 0.5648(3) 0.0390(2) 0.72242(19) 0.0245(5) Uani 1 1 d . . . 
O3 O 0.3848(3) 0.3296(2) 0.57657(19) 0.0277(6) Uani 1 1 d . . . 
O4 O 0.6254(4) 0.4256(2) 0.5903(2) 0.0329(6) Uani 1 1 d . . . 
C1 C 0.7728(5) -0.0311(4) 0.5706(3) 0.0333(9) Uani 1 1 d . . . 
H1A H 0.7855 -0.0847 0.5117 0.050 Uiso 1 1 calc R . . 
H1B H 0.8742 -0.0625 0.6086 0.050 Uiso 1 1 calc R . . 
H1C H 0.7810 0.0548 0.5453 0.050 Uiso 1 1 calc R . . 
C2 C 0.5881(5) -0.0321(3) 0.6403(3) 0.0236(8) Uani 1 1 d . . . 
C3 C 0.3841(5) 0.0508(3) 0.7931(3) 0.0233(7) Uani 1 1 d . . . 
H3A H 0.4000 0.0642 0.8641 0.028 Uiso 1 1 calc R . . 
H3B H 0.3331 -0.0272 0.7941 0.028 Uiso 1 1 calc R . . 
C4 C 0.2466(5) 0.1618(3) 0.7581(3) 0.0208(7) Uani 1 1 d . . . 
H4A H 0.2488 0.1486 0.6835 0.025 Uiso 1 1 calc R . . 
C5 C 0.0365(5) 0.1706(3) 0.8149(3) 0.0207(7) Uani 1 1 d . . . 
C6 C -0.0177(5) 0.0404(3) 0.8353(3) 0.0250(8) Uani 1 1 d . . . 
H6A H -0.0187 0.0046 0.7684 0.030 Uiso 1 1 calc R . . 
H6B H 0.0793 -0.0152 0.8672 0.030 Uiso 1 1 calc R . . 
C7 C -0.2070(5) 0.0428(3) 0.9050(3) 0.0285(8) Uani 1 1 d . . . 
H7A H -0.2691 -0.0258 0.9038 0.034 Uiso 1 1 calc R . . 
C8 C -0.2911(5) 0.1350(4) 0.9675(3) 0.0304(8) Uani 1 1 d . . . 
H8A H -0.4096 0.1294 1.0103 0.036 Uiso 1 1 calc R . . 
C9 C -0.2070(5) 0.2486(4) 0.9736(3) 0.0310(8) Uani 1 1 d . . . 
H9A H -0.2198 0.2679 1.0473 0.037 Uiso 1 1 calc R . . 
H9B H -0.2789 0.3208 0.9406 0.037 Uiso 1 1 calc R . . 
C10 C -0.0001(5) 0.2330(3) 0.9216(3) 0.0230(7) Uani 1 1 d . . . 
H10A H 0.0730 0.1748 0.9668 0.028 Uiso 1 1 calc R . . 
C11 C 0.0693(5) 0.3573(3) 0.9147(3) 0.0284(8) Uani 1 1 d . . . 
H11A H -0.0013 0.4179 0.8711 0.034 Uiso 1 1 calc R . . 
H11B H 0.0455 0.3920 0.9847 0.034 Uiso 1 1 calc R . . 
C12 C 0.2778(5) 0.3399(3) 0.8689(3) 0.0289(8) Uani 1 1 d . . . 
H12A H 0.3483 0.2850 0.9161 0.035 Uiso 1 1 calc R . . 
H12B H 0.3180 0.4222 0.8638 0.035 Uiso 1 1 calc R . . 
C13 C 0.3287(5) 0.2821(3) 0.7608(3) 0.0240(7) Uani 1 1 d . . . 
H13A H 0.4687 0.2551 0.7462 0.029 Uiso 1 1 calc R . . 
C14 C 0.2847(5) 0.3779(3) 0.6769(3) 0.0294(8) Uani 1 1 d . . . 
H14A H 0.1474 0.3956 0.6784 0.035 Uiso 1 1 calc R . . 
H14B H 0.3238 0.4570 0.6889 0.035 Uiso 1 1 calc R . . 
C15 C 0.5604(5) 0.3559(3) 0.5467(3) 0.0226(7) Uani 1 1 d . . . 
C16 C 0.8219(5) 0.3062(3) 0.3980(3) 0.0233(7) Uani 1 1 d . . . 
C17 C 0.9594(5) 0.3548(3) 0.4336(3) 0.0253(8) Uani 1 1 d . . . 
H17A H 0.9386 0.3782 0.5037 0.030 Uiso 1 1 calc R . . 
C18 C 1.1249(5) 0.3690(3) 0.3674(3) 0.0265(8) Uani 1 1 d . . . 
H18A H 1.2172 0.4031 0.3916 0.032 Uiso 1 1 calc R . . 
C19 C 1.1561(5) 0.3336(3) 0.2658(3) 0.0274(8) Uani 1 1 d . . . 
C20 C 1.0245(5) 0.2827(3) 0.2296(3) 0.0281(8) Uani 1 1 d . . . 
H20A H 1.0483 0.2572 0.1599 0.034 Uiso 1 1 calc R . . 
C21 C 0.8582(5) 0.2692(3) 0.2954(3) 0.0274(8) Uani 1 1 d . . . 
H21A H 0.7672 0.2343 0.2706 0.033 Uiso 1 1 calc R . . 
C22 C -0.0944(5) 0.2448(3) 0.7461(3) 0.0268(8) Uani 1 1 d . . . 
H22A H -0.2258 0.2506 0.7818 0.040 Uiso 1 1 calc R . . 
H22B H -0.0752 0.2017 0.6807 0.040 Uiso 1 1 calc R . . 
H22C H -0.0654 0.3292 0.7319 0.040 Uiso 1 1 calc R . . 
H1D H 0.589(6) 0.251(4) 0.441(3) 0.021(10) Uiso 1 1 d . . . 
  
loop_ 
 _atom_site_aniso_label 
 _atom_site_aniso_U_11 
 _atom_site_aniso_U_22 
 _atom_site_aniso_U_33 
 _atom_site_aniso_U_23 
 _atom_site_aniso_U_13 
 _atom_site_aniso_U_12 
N1 0.0213(16) 0.0242(16) 0.0349(17) -0.0028(13) -0.0053(14) -0.0123(13) 
Br1 0.0253(2) 0.0555(3) 0.0454(3) -0.0058(2) 0.00618(17) -0.01195(18) 
O1 0.0331(15) 0.0374(16) 0.0480(17) -0.0137(13) -0.0053(13) -0.0144(13) 
O2 0.0167(12) 0.0258(13) 0.0313(13) -0.0036(11) -0.0046(10) -0.0040(10) 
O3 0.0211(13) 0.0305(14) 0.0323(14) 0.0030(11) -0.0017(11) -0.0118(10) 
O4 0.0295(14) 0.0344(15) 0.0371(15) -0.0099(12) -0.0014(12) -0.0142(12) 
C1 0.027(2) 0.034(2) 0.037(2) -0.0035(17) -0.0054(17) -0.0026(16) 
C2 0.0200(18) 0.0194(17) 0.0322(19) -0.0039(15) -0.0072(15) -0.0024(14) 
C3 0.0161(17) 0.0243(18) 0.0281(18) -0.0011(14) -0.0028(14) -0.0015(14) 
C4 0.0173(17) 0.0236(17) 0.0228(17) -0.0003(14) -0.0052(13) -0.0054(14) 
C5 0.0153(16) 0.0226(17) 0.0252(17) -0.0005(14) -0.0067(14) -0.0030(13) 
C6 0.0187(17) 0.0286(19) 0.0295(18) -0.0003(15) -0.0076(15) -0.0062(14) 
C7 0.0214(18) 0.030(2) 0.036(2) 0.0098(17) -0.0104(16) -0.0088(15) 
C8 0.0186(18) 0.039(2) 0.031(2) 0.0100(17) -0.0037(15) -0.0049(16) 
C9 0.0214(19) 0.039(2) 0.0288(19) -0.0014(16) 0.0015(15) -0.0012(16) 
C10 0.0181(17) 0.0236(18) 0.0266(18) 0.0000(14) -0.0059(14) -0.0005(14) 
C11 0.032(2) 0.0257(19) 0.0274(19) -0.0086(15) -0.0041(16) -0.0031(15) 
C12 0.027(2) 0.0242(19) 0.037(2) -0.0037(16) -0.0075(16) -0.0064(15) 
C13 0.0167(17) 0.0249(18) 0.0307(19) -0.0015(15) -0.0041(14) -0.0044(14) 
C14 0.0210(18) 0.0257(19) 0.037(2) -0.0017(16) 0.0030(15) -0.0034(15) 
C15 0.0219(18) 0.0160(17) 0.0291(18) 0.0031(14) -0.0051(15) -0.0021(14) 
C16 0.0216(18) 0.0148(16) 0.0338(19) 0.0012(14) -0.0078(15) -0.0019(13) 
C17 0.0254(19) 0.0208(17) 0.0301(19) -0.0065(15) -0.0076(15) -0.0012(14) 
C18 0.0203(18) 0.0233(18) 0.037(2) -0.0037(15) -0.0084(15) -0.0029(14) 
C19 0.0194(18) 0.0263(19) 0.034(2) -0.0014(16) -0.0012(15) -0.0028(14) 
C20 0.0249(19) 0.030(2) 0.0288(19) -0.0057(16) -0.0024(15) -0.0040(15) 
C21 0.029(2) 0.0230(18) 0.034(2) -0.0031(15) -0.0095(16) -0.0106(15) 
C22 0.0202(18) 0.032(2) 0.0286(19) 0.0026(16) -0.0055(15) -0.0060(15) 
  
_geom_special_details 
; 
 All esds (except the esd in the dihedral angle between two l.s. planes) 
 are estimated using the full covariance matrix.  The cell esds are taken 
 into account individually in the estimation of esds in distances, angles 
 and torsion angles; correlations between esds in cell parameters are only 
 used when they are defined by crystal symmetry.  An approximate (isotropic) 
 treatment of cell esds is used for estimating esds involving l.s. planes. 
; 
  
loop_ 
 _geom_bond_atom_site_label_1 
 _geom_bond_atom_site_label_2 
 _geom_bond_distance 
 _geom_bond_site_symmetry_2 
 _geom_bond_publ_flag 
N1 C15 1.359(5) . ? 
N1 C16 1.400(5) . ? 
Br1 C19 1.903(4) . ? 
O1 C2 1.201(4) . ? 
O2 C2 1.336(4) . ? 
O2 C3 1.452(4) . ? 
O3 C15 1.355(4) . ? 
O3 C14 1.455(4) . ? 
O4 C15 1.200(4) . ? 
C1 C2 1.483(5) . ? 
C3 C4 1.534(5) . ? 
C4 C13 1.548(5) . ? 
C4 C5 1.567(5) . ? 
C5 C6 1.537(5) . ? 
C5 C22 1.541(5) . ? 
C5 C10 1.554(5) . ? 
C6 C7 1.504(5) . ? 
C7 C8 1.316(5) . ? 
C8 C9 1.498(5) . ? 
C9 C10 1.523(5) . ? 
C10 C11 1.527(5) . ? 
C11 C12 1.513(5) . ? 
C12 C13 1.542(5) . ? 
C13 C14 1.513(5) . ? 
C16 C21 1.396(5) . ? 
C16 C17 1.400(5) . ? 
C17 C18 1.377(5) . ? 
C18 C19 1.381(5) . ? 
C19 C20 1.380(5) . ? 
C20 C21 1.379(5) . ? 
  
loop_ 
 _geom_angle_atom_site_label_1 
 _geom_angle_atom_site_label_2 
 _geom_angle_atom_site_label_3 
 _geom_angle 
 _geom_angle_site_symmetry_1 
 _geom_angle_site_symmetry_3 
 _geom_angle_publ_flag 
C15 N1 C16 126.4(3) . . ? 
C2 O2 C3 116.5(3) . . ? 
C15 O3 C14 114.6(3) . . ? 
O1 C2 O2 123.0(3) . . ? 
O1 C2 C1 125.3(3) . . ? 
O2 C2 C1 111.7(3) . . ? 
O2 C3 C4 109.5(3) . . ? 
C3 C4 C13 108.1(3) . . ? 
C3 C4 C5 114.8(3) . . ? 
C13 C4 C5 114.8(3) . . ? 
C6 C5 C22 106.8(3) . . ? 
C6 C5 C10 107.0(3) . . ? 
C22 C5 C10 110.3(3) . . ? 
C6 C5 C4 111.6(3) . . ? 
C22 C5 C4 109.5(3) . . ? 
C10 C5 C4 111.5(3) . . ? 
C7 C6 C5 113.2(3) . . ? 
C8 C7 C6 123.4(3) . . ? 
C7 C8 C9 122.4(3) . . ? 
C8 C9 C10 113.4(3) . . ? 
C9 C10 C11 111.0(3) . . ? 
C9 C10 C5 111.3(3) . . ? 
C11 C10 C5 112.7(3) . . ? 
C12 C11 C10 110.8(3) . . ? 
C11 C12 C13 113.0(3) . . ? 
C14 C13 C12 112.0(3) . . ? 
C14 C13 C4 113.6(3) . . ? 
C12 C13 C4 112.6(3) . . ? 
O3 C14 C13 109.3(3) . . ? 
O4 C15 O3 124.8(3) . . ? 
O4 C15 N1 126.1(3) . . ? 
O3 C15 N1 109.1(3) . . ? 
C21 C16 C17 118.7(3) . . ? 
C21 C16 N1 117.7(3) . . ? 
C17 C16 N1 123.5(3) . . ? 
C18 C17 C16 120.4(3) . . ? 
C17 C18 C19 119.8(3) . . ? 
C20 C19 C18 120.9(3) . . ? 
C20 C19 Br1 119.0(3) . . ? 
C18 C19 Br1 120.1(3) . . ? 
C21 C20 C19 119.5(3) . . ? 
C20 C21 C16 120.7(3) . . ? 
  
loop_ 
 _geom_hbond_atom_site_label_D 
 _geom_hbond_atom_site_label_H 
 _geom_hbond_atom_site_label_A 
 _geom_hbond_distance_DH 
 _geom_hbond_distance_HA 
 _geom_hbond_distance_DA 
 _geom_hbond_angle_DHA 
 _geom_hbond_site_symmetry_A 
N1 H1D O1  0.76(4) 2.18(4) 2.900(4) 157(4) 2_656 
  
_diffrn_measured_fraction_theta_max    0.988 
_diffrn_reflns_theta_full              25.00 
_diffrn_measured_fraction_theta_full   0.988 
_refine_diff_density_max    0.912 
_refine_diff_density_min   -0.341 
_refine_diff_density_rms    0.085 
